## 26 **Abstract**

27

28 Genetic diversity within *Trialeurodes vaporariorum* (Westwood, 1856) remains  
 29 largely unexplored, particularly within regions of Sub-Saharan Africa. In this study, *T.*  
 30 *vaporariorum* samples were obtained from three locations in Kenya: Katumani,  
 31 Kiambu and Kajiado counties. DNA extraction, PCR and Sanger sequencing were  
 32 carried out on ~750 bp fragment of the mitochondria cytochrome c oxidase I (COI)  
 33 gene from individual whiteflies. In addition, global populations were assessed and 19  
 34 haplotypes were identified, with three main haplotypes (Hp\_19, Hp\_10, Hp\_011)  
 35 circulating within Kenya. Measures of genetic diversity among *T. vaporariorum*  
 36 populations resulted in haplotype diversity of 0.411, nucleotide diversity 0.00096,  
 37 and Tajima's D -0.30315, ( $P > 0.10$ ). Analysis of population structure across global  
 38 sequences using Structurama indicated one population globally, with posterior  
 39 probability of 0.72. Bayesian and maximum likelihood phylogenetic analysis gave  
 40 support for two clades (Clade I = an admixed global population and Clade II = subset  
 41 of Kenyan and 1 Greek sequence). Species delimitation between the two clades was  
 42 assessed by four parameters; posterior probability, Kimura's two parameter (K2P),  
 43 Rodrigo's P (Randomly distinct) and Rosenberg's reciprocal monophyly (P(AB). The  
 44 two clades within the phylogenetic tree showed evidence of distinctness based on;  
 45 Kimura two parameters (K2P) ( $p = -1.21E-01$ ), Rodrigo's P (RD) ( $p = 0.05$ ) and  
 46 Rosenberg's P(AB) ( $p = 2.3E-13$ ). Overall, low genetic diversity within the Kenyan  
 47 samples is a likely indicator of recent population expansion and colonization with  
 48 this region and plausible signs of species complex formation in Sub-Saharan Africa.

49 **Key Words:** *Trialeurodes vaporariorum*, Population Structure, Phylogenetics, Species  
 50 Delimitation, Genetic Diversity, Kenya

51  
52 Whiteflies are important agricultural pests with a global distribution (Anderson *et al.*,  
53 2004; Lapidot *et al.*, 2014 ). Their agricultural importance is associated with damage  
54 caused during feeding on the plant phloem and the production of honeydew (Colvin  
55 *et al.*, 2006; Prijović *et al.*, 2013). Honeydew serves both to reduce transpiration and  
56 as an inoculation point for saprophytic fungi which grows over the leaf surface  
57 reducing photosynthesis (Colvin *et al.*, 2006). Among the most economically  
58 important whiteflies is the greenhouse whitefly, *Trialeurodes vaporariorum*  
59 (Westwood, 1856) which transmits a number of plant viruses of the genera *Crinivirus*  
60 and *Torradovirus* (Navas-Castillo *et al.*, 2011; Navas-Castillo *et al.*, 2014). Of these,  
61 the *Criniviruses*, Tomato chlorosis virus (ToCV) and Tomato infectious chlorosis virus  
62 (TICV) are of major economic importance in tomato production globally (Wisler 1998,  
63 Wintermantel *et al.*, 2009). In Africa, ToCV and TICV have been reported from  
64 Morocco and South Africa (EPPO, 2005) and more recently from within greenhouses  
65 in Sudan (Fiallo-Olivé, *et al.*, 2011). The viruses are able to infect a wide host range  
66 beyond tomato (Fortes *et al.*, 2012). Production loss attributed to *T. vaporariorum*  
67 transmitted viruses such as the sweet potato chlorotic stunt virus are a major  
68 constraint on sweet potato production in Kenya, with uninfected sweet potatoes  
69 yielding 50% more production than infected plants (Ateka *et al.*, 2004; Miano *et al.*,  
70 2008).

71

## 72 **Phylogeographical structure of *T. vaporariorum* in Sub-Saharan Africa (SSA)**

73 Though *T. vaporariorum* is globally distributed, few studies have explored the  
74 phylogeographical structuring and genetic diversity of *T. vaporariorum* populations

75 from Sub-Saharan Africa and in particular Kenya (Mound and Halsey 1978; Njaramb,  
76 2000). The majority of phylogeographical studies of *T. vaporariorum* have been  
77 confined to temperate regions (Roopa *et al.*, 2012; Kapantaidaki *et al.*, 2014; Prijović  
78 *et al.*, 2014). In most of these studies there was lack of distinct phylogeographical  
79 structuring that was further coupled with low genetic diversity.

80

81 Roopa *et al.*, (2012) used both mitochondrial COI (mtCOI) and nuclear markers to  
82 assess the genetic diversity and phylogeographical structuring of *T. vaporariorum*  
83 within populations in India. They reported no significant differences among *T.*  
84 *vaporarioum* populations. Kapantaidaki *et al.* (2014) supported these findings using a  
85 combination of mtCOI and secondary endosymbionts. In addition, Prijović *et al.*  
86 (2013) reported a similar lack of phylogeographical structuring across populations in  
87 Serbia and surrounding countries. However, some studies have reported population  
88 structuring in different regions, with several drivers implicated as influencing  
89 population structure. In particular, Ovčarenko *et al.* (2014) reported population  
90 structuring in Finland and attributed this to habitats, field versus greenhouses  
91 populations. Gao *et al.*, (2014) reported population structuring across the different  
92 regions of China and suggested the primary driver was multiple introduction points  
93 into China. There have been no similar studies in southern Africa.

94

95 On the basis of these studies we posed the following question: Do *T. vaporarioum*  
96 samples from sub-Saharan Africa and in particular Kenya have distinct  
97 phylogeographical structuring compared to global populations?

98

## 99     **How the hypothesis will be tested**

100     To help answer the question, we carried out field survey in 2014 across smallholder  
 101     farms located in the Kenyan highlands, which produce primarily common bean  
 102     (*Phaseolus vulgaris*, var *humilis* Alef). Using mtCOI we compared the genetic  
 103     diversity found in Kenya with that previously observed for *T. vaporariorum* in other  
 104     parts of the world using records stored in GenBank. We assessed the genetic  
 105     diversity of the different *T. vaporariorum* global populations and explored signals of  
 106     species complex formation; this was based on several species delimitation methods.  
 107     We report for the first time the phylogeographical structuring of *T. vaporariorum*  
 108     samples within Sub-Saharan Africa and in particular Kenya, compared to global *T.*  
 109     *vaporariorum* samples.

110

111

112

113

114

## 115 MATERIALS AND METHODS

116

### 117 Sample Collection

118 Sample collection of whiteflies was carried out on private property, following  
 119 informed consent from the landowners. Adult whiteflies were collected on common  
 120 beans (*Phaseolus vulgaris*) growing within smallholder farms in Kenya. Sampling  
 121 was done in the short rain season of November 2014, across counties sub-counties  
 122 in Katumani/Machakos, Kiambu and Kajiado (Fig 1). In each farm, common bean  
 123 plants were examined for the presence of whiteflies across a 'z' transect. Whiteflies  
 124 were collected using a mouth aspirator and aspirated directly into a falcon tube (BD,  
 125 Biosciences USA) with RNAlater (Sigma, USA). Whiteflies were then shipped to the  
 126 University of Western Australia and stored at room temperature.

127

### 128 Genomic DNA Isolation

129 Genomic DNA was extracted from individual whiteflies collected from each of the  
 130 three sites using the Zymo Insect and Tissue extraction kit (Zymo, USA) as described  
 131 by the manufacturer. Individual whiteflies were added into a ZR Bashing bead lysis  
 132 tube containing 750 µl lysis solution. Bashing beads were then mounted on a Fast  
 133 Prep®-24 MP bead beater and ground at 6 M/S for 40 seconds. Bashing beads were  
 134 centrifuged at 10,000 x g for 1 minute. Subsequent steps were essentially as  
 135 described by the manufacturer, with the only modification being the elution of  
 136 genomic DNA with 30 µl of nuclease free water followed by a centrifugation step at  
 137 10,000 x g for 30 seconds. Genomic DNA was stored at -20°C until analysis was  
 138 carried out.

139

## 140 **Polymerase Chain Reaction and Sequencing**

141 Mitochondria COI *Trialeurodes vaporariorum* specific primers CO1-F:

142 5'-GCCTGGTTTTGGCATTA-3' and the reverse primer CO1-R:

143 5'-GCTTATTAGCACCCACTCTA-3' were used to amplify ~752 bp of COI gene (Gao, et

144 al., 2014). Polymerase chain reaction (PCR) was carried out in a total reaction mix of

145 20 µl with 5 ul of whitefly DNA as template, 10 ul Bulk AccuPower <sup>(R)</sup> PCR Premix

146 containing 1U of Top DNA polymerase, 250 µl of dNTP (dATP, dCTP, dGTP, dTTP),

147 10mM Tris-HCl (pH9.0), 30mM KCl, 1.5mM MgCl<sub>2</sub>, 1 µl of forward and reverse

148 primers and 3 µl of nuclease free water. The PCR reaction was run on an eppendorf

149 thermocycler (Eppendorf, Hamburg Germany) under the following conditions; Initial

150 denaturation for 2 min at 94°C followed by 35 cycles of 94°C for 20 seconds,

151 annealing for 30 seconds at 52°C, elongation for 1 minute at 72°C, final elongation

152 for 30 min at 72°C. PCR amplicons were separated in a 2% agarose gel pre-stained

153 with gel red (Biotium, CA, USA) and run in 0.5 X Tris Boric EDTA (TBE) electrophoresis

154 buffer for 35 minutes at 100V and detected under UV light (Biorad, CA, USA). PCR

155 products were purified using Qiaquick PCR purification kit (Qiagen Inc.) as described

156 by the manufacturer. Purified PCR products were sent for bi-directional Sanger

157 sequencing at Macrogen Korea.

158

## 159 **Sequence Alignment and GenBank Data Retrieval**

160 A total of n=31 forward and reverse sequences of the 3' end of mtCOI were obtained.

161 Raw chromatograms were manually inspected using Geneious version 8

162 (<http://www.geneious.com>, Kearse et al., 2012) across all the bases, with

ambiguities corrected. Consensus sequences were generated for each whitefly, and used for subsequent analysis. Basic local alignment search (BLAST) was carried out to confirm that all sequences were *T. vaporariorum*. In addition, n = 228 *T. vaporariorum* COI sequences were retrieved from GenBank and combined with sequences from this study (Supplementary Table 1). The combined sequences were aligned using MAFFT in Geneious version 8 with default parameters (Kearse et al., 2012). Manual inspection, adjustment of gaps and trimming of overhangs was carried out.

171

#### 172 ***Trialeurodes vaporariorum* Haplotype Distribution Across Geographical Locations**

To better understand the distribution of *T. vaporariorum* haplotypes across geographical locations and reduce redundancy within COI sequences deposited in GenBank. *T. vaporariorum* COI sequences were categorised based on geographical locations considered to have similar climatic properties as illustrated within global ecoregion maps (Olson, et al., 2002) Representative sequences from each of the haplotypes and across the five geographical locations were selected creating a subset of 90 sequences for subsequent analysis (Table 2). Classification was as follows: location 1, - n = 40 sequences from Europe Asia, and North Africa; location 2, - n = 31 sequences from Sub-Saharan (Kenya) (this study), location 3 - n = 11 sequences from South America, Central America, and the Caribbean; location 4, India, China - n=7 sequences from India and China; and location 5 - n=1 sample sequences from North America (USA). Location 5 was excluded from all population analysis, since only one sequence could be retrieved from the GenBank.

186



## 187 **Inter-Population Genetic Diversity**

188 The number of haplotypes within *T. vaporariorum* sequences was determined using  
189 GenAlex (Peakall & Smouse, 2012). mtCOI variation across the sequences was  
190 assessed using DNAsp v 5.0 (Librado & Rozas, 2009). Default program parameters  
191 were used during both the analyses.

192

## 193 **Haplotypes Networks Based on MtCOI Sequences of *Trialeurodes vaporariorum***

194 Association between haplotypes across the four global geographical locations were  
195 determined using median joining algorithms implemented in NETWORK version 5.0  
196 (Bandelt *et al.*, 1999) with two outgroups *T. ricin* and *T. lauri* included under default  
197 parameters.

198

## 199 **Phylogenetic Analysis**

200 Selection of the optimal model for phylogenetic analysis was determined using  
201 jModeltest 2 (Darriba *et al.*, 2012), using 11 substitution schemes. The optimal  
202 model selected based on the Akaike information criterion was (TPM2uf+G), while  
203 the optimal model in Bayesian information criterion was (HKY+I). The model HKY+I  
204 was selected since it considered variable base frequencies of one transition rate and  
205 one transversion rate. MrBayes was run on the Magnus Supercomputer at the  
206 Pawsey Supercomputer Centre at the University of Western Australia using 76  
207 core/hours (274230s). Bayesian analysis was carried out for two independent runs  
208 using the command “lset nst=2 rates=gamma” for 50 million generations, with trees  
209 sampled every 1000 generations. In each of the runs, the first 25% (2,500) trees  
210 were discarded as burn in. Convergence of the runs was determined using Tracer

211 v1.6.0 (Rambaut & Suchard, 2014). Maximum Likelihood (ML) phylogenetic trees  
212 with bootstraps and nucleotide model set at  $T_i \neq T_v$  rate (2 ST) and were generated  
213 in PAUP\* 4.0a147 (Swofford, 2003).

214

## 215 **Species Delimitation**

216 Clades identified within the *T. vaporariorum* phylogeny were assessed as potential  
217 emerging species of *Trialeurodes vaporariorum* using the species delimitation plugin  
218 (Masters, Fan, & Ross, 2011) in Geneious version 8 (<http://www.geneious.com>,  
219 Kearse *et al.*, 2012). We used several species delimitation parameters on the mtCOI  
220 sequences; Kimura two parameter (K2P), Rodrigo's (P(random distinct) posterior  
221 probabilities (liberal and strict) and Rosenberg's P(AB) to evaluate either presence  
222 species delimitation within *T. vaporariorum* COI sequences (Table 5).

223

## 224 **Evaluation of *T. vaporariorum* Population Structure using Bayesian Analysis**

225 To determine the population structure of *T. vaporariorum* mtCOI sequences across  
226 different geographical locations we analysed using Structurama 2.0 (Huelsenbeck,  
227 Andolfatto, & Huelsenbeck, 2011), which implements a Dirichlet process prior for  
228 the number of populations. The default parameters of Gamma (0.100, 10.000) were  
229 run, and the model without admixture was used. MCMC was run for one million  
230 generations and samples were collected every 1000 generations. Two independent  
231 runs were carried out to confirm that the MCMC algorithm converged to the same  
232 values (Table 4)

233

## 234     **Results**

235

### 236     **Distribution of *T. vaporariorum* Haplotypes Across Global Populations**

237

238     In this study, 31 *T. vaporariorum* sequences were generated and deposited in  
239     GenBank under accession numbers KX058201-KX058231 (Table 1) and compared  
240     with 228 sequences obtained from GenBank (Supplementary Table 1). Analysis  
241     across the combined global dataset based on representative 90 sequences revealed  
242     19 haplotypes (Table 2).

243

### 244     **Inter-Population Genetic Diversity**

245

246     Comparison of the genetic variation within *T. vaporariorum* was based on 443 bp  
247     fragments of COI sequences across all the populations. A majority of the haplotypes  
248     were from geographical location 1 (Europe Asia, and North Africa), while  
249     geographical location 2 Sub Saharan (this study) had the fewest (n = 3) haplotypes  
250     (Table 2). Assessment of population expansion based on neutrality test showed low  
251     values for Tajima's D statistics across all four geographical locations indicative of  
252     population contraction; location 1 (-1.58699, p > 0.10), location 2 (-0.30315, p >  
253     0.10), location 3 (0.00351, p > 0.05) and location 4 (-1.23716, p>0.10) (Table 3),  
254     however none of the values were found to be statistically significant (Table 3).

255

256

257

258

259

## 260 Median Joining Networks Based on MtCOI Sequences of *Trialeurodes*

### 261 *vaporariorum*

262 Assessments of genetic relationships among the 19 haplotypes identified (Table 2)  
263 was based on a median joining network of the COI sequences (Fig 2), showing two  
264 ancestral haplotypes highlighted in red, red/black colour, while the rest of the  
265 haplotypes diverged from them. Haplotypes 9 (HP\_9) and 18 (HP\_018) were the  
266 dominant haplotypes across all geographical locations. Within the location 2 (Kenya),  
267 haplotype 9, 10 and 11 (Hp\_9, Hp\_10, Hp\_011) were present.

268

## 269 Phylogenetic analysis and species delimitation analysis of *Trialeurodes*

### 270 *vaporariorum*

271

272 Phylogenetic relationships of *T. vaporariorum* across the geographical locations was  
273 assessed using Bayesian phylogenetic inference as implemented in MrBayes 3.2.2  
274 (Huelsenbeck *et al.*, 2011) and maximum likelihood methods. Phylogenetic trees  
275 from both methods (Supplementary Fig. 1 and Supplementary Fig. 2) yielded two  
276 main clades, that are supported with 50% bootstrap support and >0.9 posterior  
277 probability respectively. Clade I was the largest clade, with a majority of *T.*  
278 *vaporariorum* including a subset of samples from geographical location 2 (SSA-  
279 Kenya). Clade II comprised of mainly *T. vaporariorum* individual sequences from  
280 geographical location 2 (SSA-Kenya) and one sequence from Greece. *T. ricin* and *T.*  
281 *lauri* were used as the outgroups for rooting the tree based on phylogenetic rooting  
282 methods described in (Kinene *et al.*, 2016).

283

284

## 285 **Bayesian analysis of *Trialeurodes vaporariorum* Population Structure**

286

287 Population structure of *T. vaporariorum* was evaluated using Structurama 2.0, with  
288 default parameter settings and no admixture. All of the *T. vaporariorum* sequences  
289 clustered as one population (K=1), supported by a posterior probability of 0.72  
290 (Table 4), with posterior probability of 0.17 for K=2 populations. All other numbers of  
291 populations received posterior probability of less than 0.10.

292

## 293 **Species Delimitation**

294

295 The two clades within the phylogenetic tree showed evidence of distinctness based  
296 on Kimura two parameters (K2P) ( $p = -1.21E-01$ ), Rodrigo's P (RD) ( $p = 0.05$ ) and  
297 Rosenberg's P(AB) ( $p = 2.3E -13$ ) (Table 5). Across the two clades all the sequences  
298 were monophyletic with genetic distance ranging between (0.2) and (0.7) (Table 5).  
299 The posterior probabilities of correct assignment of unknown species based on strict  
300 P ID (strict) and P ID (liberal) were ( $p > 0.94$ ) and ( $p > 0.99$ ) respectively (Table 5).

301

302

303

## 304 **DISCUSSION**

305 In this study, we assessed the phylogeographical structuring and genetic diversity of  
 306 *T. vaporariorum* within a previously underreported region (Sub-Saharan Africa).  
 307 Phylogeographical structuring resulted in two main clades across representative  
 308 global isolates with clade I (globally admixed) and II (Kenyan and one Greek sample).  
 309 In contrast, genetic diversity across these global *T. vaporariorum* samples was low  
 310 (Table 3). Species delimitation measures showed differences between *T.*  
 311 *vaporariorum* isolates from Kenya compared to other geographical locations  
 312 revealing plausible signs of species complex formation within a previously  
 313 monophyletic group.

314

### 315 **Genetic Diversity of *T. vaporariorum* Across Global Samples**

316 Genetic diversity of *T. vaporariorum* and haplotypes counts were based on a 443bp  
 317 fragment of mtCOI sequence. A total of 19 *T. vaporariorum* haplotypes were present  
 318 among all global sequences, with 3 haplotypes (Hp-9, Hp-10, Hp-11) present within *T.*  
 319 *vaporariorum* from Kenya geographical location 2 (Table 2). Haplotype diversity  
 320 ranged between 0.411 in population 2 to 0.956 in geographical location 3 (Table 3).  
 321 Neutrality tests based on Tajima's D statistic indicated low levels of genetic diversity  
 322 across the global populations (Table 3). Our findings are comparable to previous  
 323 genetic and population diversity studies of *T. vaporariorum*, indicating low genetic  
 324 diversity (Roopa *et al.*, 2012, Shin *et al.*, 2013, Kapantaidaki *et al.*, 2014, Prijović *et*  
 325 *al.*, 2014). Low genetic diversity within *T. vaporariorum* indicates recent population  
 326 expansion and colonization into the regions. A possible explanation of the low

327 genetic diversity of *T. vaporariorum* across global locations and in specifically from  
 328 this study could be two-fold. Firstly, there has been an increase in global trade on  
 329 horticultural products; mainly cut flowers from Kenya (Ulrich, 2014). This has  
 330 resulted in increased importation of flower cuttings as propagation material from  
 331 temperate ecoregions. Flower cuttings are potential carriers of *T. vaporariorum*  
 332 because the eggs are invisible but readily hatch under ideal climatic conditions. This  
 333 mode of *T. vaporariorum* movement has been implicated as one of the main modes  
 334 of distribution of invasive pests globally (Grapputo *et al.*, 2005). Secondly,  
 335 proliferation of polyhouses for horticulture production potentially provide  
 336 appropriate microclimatic conditions sufficient for the emergence of *T. vaporariorum*  
 337 and subsequent release into the open field. The importance of the polyhouse in  
 338 building up *T. vaporariorum* populations and controlling gene flow have previously  
 339 been reported in India, Northern and Southern Europe (Roopa *et al.*, 2012;  
 340 Ovčarenko *et al.*, 2014).

341

## 342 **Haplotype Networks**

343 Evaluation of the relationship among the 19 *T. vaporariorum* haplotypes (Table 2)  
 344 across five global geographical location based on the median joining network (Fig. 2)  
 345 showed two ancestral nodes (Hp\_09, Hp\_018) (Fig. 2) that were present across all  
 346 geographical locations. Within the SSA population three main haplotypes were in  
 347 circulation (Hp\_09, Hp\_10, Hp\_11) (Table 1) while Haplotype\_11 was found as a  
 348 distinct haplotype within this population. Our findings concur with previous reports  
 349 on the number of haplotypes within *T. vaporariorum* (Prijović *et al.*, 2014). An  
 350 overlap in haplotypes across the geographical location could indicate a single source

351 of *T. vaporariorum* lineages that are easily adapted to different niche habitats  
352 (Kapantaidaki *et al.*, 2014). However distinct haplotypes and clades within location 2  
353 (SSA-Kenya) could be indications of local adaptations of *T. vaporariorum*.

354

### 355 **Phylogeographical Structuring and Species Delimitation Genotypes**

356 The evolutionary relationships among the *T. vaporariorum* sequences across  
357 geographical locations were reconstructed using both maximum likelihood and  
358 Bayesian phylogenetic analysis. Both phylogenetic trees resulted in two main clades  
359 (Supplementary Fig.1 and Supplementary Fig. 2). Clade I was the largest clade  
360 composed of *T. vaporariorum* samples from all the geographical locations while  
361 clade II comprised of a subset of *T. vaporariorum* sequences from SSA (Kenya) and  
362 one Greek samples. This is contrary to previous phylogenetic relationships of *T.*  
363 *vaporariorum*, where a single clade was observed across *T. vaporariorum*  
364 populations collected (Roopa *et al.*, 2012; Prijović *et al.*, 2014; Kapantaidaki *et al.*,  
365 2014). In this study, we report existence of at least two main clades within *T.*  
366 *vaporariorum* that are supported by bootstrap values of >60% and posterior  
367 probabilities above 0.90 (Supplementary Fig. 1 and Supplementary Fig. 2). Evaluation  
368 of the two clades as distinct species revealed signs of species complex within *T.*  
369 *vaporariorum* based on species delimitation measures (Table 5). Clade distinctness  
370 was supported by Kimura two parameters (K2P) ( $p = -1.21E-01$ ), Rodrigo's P (RD) ( $p$   
371  $=0.05$ ) and Rosenberg's P(AB) ( $p = 2.3E -13$ ) (Table 5).

372

373

374



## 375    **Population structure based on Bayesian analysis**

376    Population structure analysis of *T. vaporariorum* using Structurama based on a  
 377    variable number of populations showed the strongest support for one population  
 378    (posterior probability 0.72; Table 4). There was lack of distinct clustering from *T.*  
 379    *vaporariorum* based on global geographical location (Table 5). Population structure  
 380    results of one population were contrary to the phylogenetic tree showing the  
 381    existence of two main groups within *T. vaporariorum* (Supplementary Fig. 1 and  
 382    Supplementary Fig. 2). However, our finding concur with (Gao *et al.*, 2014) where  
 383    they report lack of geographical structuring within the *T. vaporariorum* populations  
 384    though several populations were reported. This further supports our hypothesis of a  
 385    single source of *T. vaporariorum* introduced into Sub Saharan Africa.

386  
 387    Our findings highlight differences in the genetic diversity of the two whiteflies: *T.*  
 388    *vaporariorum* and *B. tabaci*, which are both circulating in the regions sampled in  
 389    Kenya. *B. tabaci* is recognized as a species complex of 34 species that are  
 390    morphologically indistinguishable (Boykin *et al.*, 2007; De Barro & Ahmed,  
 391    2011; Boykin & De Barro, 2014). *B. tabaci* putative species exhibit differences in host  
 392    range, phylogeographical clustering and potential to transmit viruses (Abdullahi *et*  
 393    *al.*, 2003; Sseruwagi *et al.*, 2006, De Barro & Ahmed, 2011; Ashfaq *et al.*, 2014; Legg  
 394    *et al.*, 2014). These differences are yet to be reported within *T. vaporariorum* and  
 395    may be present based on distinct clustering observed and plausible species complex  
 396    formation revealed in this study and would warrant further investigation.

397

398 Future studies should include a multilocus approach to provide for a more robust  
 399 and stringent species delimitation calculation to authenticate the possible existence  
 400 of a species complex formation within *T. vaporariorum*. However, it is probable that  
 401 the existence of two clades are early indicators of impending divergence within *T.*  
 402 *vaporariorum* potentially driven by phylogeographical factors as observed within *B.*  
 403 *tabaci* and *T. vaporariorum* in Europe (Boykin *et al.*, 2013; Ovčarenko *et al.*, 2014). In  
 404 addition, differences in the bacterial endosymbionts among *T. vaporariorum*  
 405 haplotypes might induce genetic sweeps within the mitochondria and thus drive the  
 406 diversification of *T. vaporariorum* (Kapantaidaki *et al.*, 2014). In addition, an  
 407 expanded sampling from outside of Europe and throughout Kenya will greatly  
 408 improve the understanding of this highly invasive pest.

409

410

# 411 **Conclusion**

412 This study provides the evidence of phylogeographical structure of *T. vaporariorum*  
 413 within Sub-Saharan Africa. In addition, the data presented here supports a putative  
 414 species complex formation within *T. vaporariorum*. Our results provide preliminary  
 415 findings for future research on the drivers for genetic population structuring and  
 416 species complex formation within *T. vaporariorum* in nascent geographical regions.

417

## 418     **Acknowledgments**

419     J.M.W is supported by an Australian Award scholarship by the Department of  
 420     Foreign Affairs and Trade (DFAT), this work forms part of his PhD research. Fieldwork  
 421     was supported by the kind consideration of Dr. John Carr through a BBSRC GRANT:  
 422     BBSRC GRANT: BB/J011762/1 and the Bioscience eastern and central Africa (BecA-  
 423     ILRI Hub). Laboratory work was performed at the Centre of Excellence Plant Energy  
 424     Biology (PEB), The University of Western Australia. We thank Dr. Charles Kariuki  
 425     Director Kenya Agricultural and Livestock Research Organization (Katumani) for  
 426     facilitating sample collection in Eastern Kenya and insightful discussions.  
 427     Supercomputer analysis was supported by resources provided by the Pawsey  
 428     Supercomputing Centre with funding from the Australian Government and the  
 429     Government of Western Australia. Research in the Boykin lab is provided by the Bill  
 430     & Melinda Gates Foundation via a subcontract (B04265) from the National Research  
 431     Institute, University of Greenwich, United Kingdom.

432

## REFERENCES

- 433
- 434 **Abdullahi, I., Winter, S., Atiri, G. I. & Thottappilly, G. (2003)** Molecular  
435 characterization of whitefly, *Bemisia tabaci* (Hemiptera: Aleyrodidae)  
436 populations infesting cassava. *Bulletin of Entomological Research*, 93, 97–106.  
437 doi:10.1079/BER2003223
- 438 **Anderson, P. K., Cunningham, A. A., Patel, N. G., Morales, F. J., Epstein, P. R. &**  
439 **Daszak, P. (2004)** Emerging infectious diseases of plants: Pathogen pollution,  
440 climate change and agrotechnology drivers. *Trends in Ecology and Evolution*,  
441 19(10), 535–544. doi:10.1016/j.tree.2004.07.021
- 442 **Ateka, E. M., Njeru, R. W., Kibaru, A. G., Kimenju, J. W., Barg, E., Gibsson, R. W. &**  
443 **Vetten, H. J (2004)** Identification and distribution of viruses infecting sweet  
444 potato in Kenya, 371–379.
- 445 **Bandelt, H. J., Forster, P. & Rohl, A. (1999)** Median-Joining Networks for Inferring  
446 Intraspecific Phylogenies. *Molecular Biology*, 16(1), 37–48.  
447 doi:10.1093/oxfordjournals.molbev.a026036
- 448 **Boykin, L. M., Bell, C. D., Evans, G., Small, I. & De Barro, P. J. (2013)** Is agriculture  
449 driving the diversification of the *Bemisia tabaci* species complex (Hemiptera:  
450 *Sternorrhyncha: Aleyrodidae*)?: Dating, diversification and biogeographic  
451 evidence revealed. *BMC Evolutionary Biology*, 13(1), 228. doi:10.1186/1471-  
452 2148-13-228
- 453 **Boykin, L. M. & De Barro, P. J. (2014)** A practical guide to identifying members of the  
454 *Bemisia tabaci* species complex: and other morphologically identical species.  
455 *Frontiers in Ecology and Evolution*, 2(August), 1–5.  
456 doi:10.3389/fevo.2014.00045
- 457 **Boykin, L. M., Shatters, R. G., Rosell, R. C., McKenzie, C. L., Bagnall, R. A., De Barro,**  
458 **P. & Frohlich, D. R. (2007)** Global relationships of *Bemisia tabaci* (Hemiptera:  
459 *Aleyrodidae*) revealed using Bayesian analysis of mitochondrial COI DNA  
460 sequences. *Molecular Phylogenetics and Evolution*, 44, 1306–1319.

doi:10.1016/j.ympev.2007.04.020

**Colvin, J., Omongo, C. A., Govindappa, M. R., Stevenson, P. C., Maruthi, M. N., Gibson, G., Seal, S. E & Muniyappa, V. (2006)** Host-Plant Viral Infection Effects on Arthropod-Vector Population Growth, Development and Behaviour: Management and Epidemiological Implications. In *Advances in Virus Research* (Vol. 67, pp. 419–452). doi:10.1016/S0065-3527(06)67011-5

**Darriba, D., Taboada, G. L., Doallo, R. & Posada, D. (2012)** jModelTest 2: more models, new heuristics and parallel computing. *Nature Methods*, 9(8), 772–772. doi:10.1038/nmeth.2109

**DeBarro, P. & Ahmed, M. (2011)** Genetic networking of the *Bemisia tabaci* cryptic species complex reveals pattern of biological invasions. *PLoS ONE*, 6(10). doi:10.1371/journal.pone.0025579

**EPPO (2005)** Tomato chlorosis *crinivirus*. *OEPP/EPPO Bulletin*, (35), 439–441. doi:10.1111/j.1365-2338.2005.00888.x

**Fiallo-Olivé, E., Hamed, A. A., Moriones, E., & Navas-Castillo, J. (2011)** First Report of Tomato chlorosis virus Infecting Tomato in Sudan. *Plant Disease*, 95(12), 1592. doi:10.1094/PDIS-08-11-0631

**Fortes, I. M., Moriones, E. & Navas-Castillo, J. (2012)** Tomato chlorosis virus in pepper: Prevalence in commercial crops in southeastern Spain and symptomatology under experimental conditions. *Plant Pathology*, 61(5), 994–1001. doi:10.1111/j.1365-3059.2011.02584.x

**Grapputo, A., Boman, S., Lindström, L., Lyytinen, A. & Mappes, J. (2005)** The voyage of an invasive species across continents: Genetic diversity of North American and European Colorado potato beetle populations. *Molecular Ecology*, 14(14), 4207–4219. doi:10.1111/j.1365-294X.2005.02740.x

- 487 **Huelsenbeck, J. P., Andolfatto, P. & Huelsenbeck, E. T. (2011)** Structurama:  
488 Bayesian inference of population structure. *Evolutionary Bioinformatics*,  
489 2011(7), 55–59. doi:10.4137/EBO.S6761
- 490 **Kapantaidaki, D. E., Ovčarenko, I., Fytro, N., Knott, K. E., Bourtzis, K. &**  
491 **Tsagkarakou, A. (2014)** Low Levels of Mitochondrial DNA and Symbiont  
492 Diversity in the Worldwide Agricultural Pest, the Greenhouse Whitefly  
493 *Trialeurodes vaporariorum* (Hemiptera: Aleyrodidae). *The Journal of Heredity*,  
494 1–13. doi:10.1093/jhered/esu061
- 495 **Kearse, M., Moir, R., Wilson, A., Stones-Havas, S., Cheung, M., Sturrock, S., Simon**  
496 **Buxton, S., Cooper, A., Markowitz, S., Duran, C., Thierer, T., Ashton, B.,**  
497 **Meintjes, P & Drummond, A. (2012)** Geneious Basic: An integrated and  
498 extendable desktop software platform for the organization and analysis of  
499 sequence data. *Bioinformatics*, 28(12), 1647–1649.  
500 doi:10.1093/bioinformatics/bts199
- 501  
502 **Kinene, T., Wainaina, J., Maina, S., & Boykin, L. M. (2016)** Rooting Trees, Methods  
503 for. *Encyclopedia of Evolutionary Biology*, 3, 489–493. doi:10.1016/B978-0-12-  
504 800049-6.00215-8
- 505  
506 **Lapidot, M., Legg, J. P., Wintermantel, W. M. & Polston, J. E. (2014)** *Management of*  
507 *Whitefly- Transmitted Viruses in Open-Field Production Systems. Control of Plant*  
508 *Virus Diseases* (1st ed., Vol. 90). Elsevier Inc. doi:10.1016/B978-0-12-801246-  
509 8.00003-2
- 510 **Legg, J. P., Sseruwagi, P., Boniface, S., Okao-Okuja, G., Shirima, R., Bigirimana, S.,**  
511 **Gashakae, G., Herrmannf, H-W., Jeremiahg, S., Obieroh, H., Ndyetabulai, I.,**  
512 **Tata-Hangyj, W., Masembe, C. & Brown, J. K (2014)** Spatio-temporal patterns  
513 of genetic change amongst populations of cassava *Bemisia tabaci* whiteflies  
514 driving virus pandemics in East and Central Africa. *Virus Research*, 186, 61–75.  
515 doi:10.1016/j.virusres.2013.11.018

- 516     **Librado, P. & Rozas, J. (2009)** DnaSP v5: a software for comprehensive analysis of  
517     DNA polymorphism data, 25(11), 1451–1452.  
518     doi:10.1093/bioinformatics/btp187
- 519     **Masters, B. C., Fan, V. & Ross, H. A. (2011)** Species delimitation-a geneious plugin  
520     for the exploration of species boundaries. *Molecular Ecology Resources*, 11(1),  
521     154–157. doi:10.1111/j.1755-0998.2010.02896.x
- 522     **Mound L. A & Halsey S.H. (1978)** Whitefly of the World. A systematic catalogue of  
523     the *Aleyrodidae (Homoptera)* with host plant and natural enemy data. British  
524     Museum (Natural History) & John Wiley & Sons, Chichester (Great Britain)
- 525     **Miano, D. W., LaBonte, D. R. & Clark, C. A. (2008)** Identification of molecular  
526     markers associated with sweet potato resistance to sweet potato virus disease  
527     in Kenya. *Euphytica*, 160(1), 15–24. doi:10.1007/s10681-007-9495-2
- 528     **Navas-Castillo, J., Lopez, J. J. & Aranda, M. A (2014)** Whitefly-transmitted RNA  
529     viruses that affect intensive vegetable production, 165, 155–171.  
530     doi:10.1111/aab.12147
- 531     **Navas-Castillo, J., Fiallo-Olivé, E. & Sánchez-Campos, S. (2011)** *Emerging virus*  
532     *diseases transmitted by whiteflies. Annual review of phytopathology* (Vol. 49).  
533     doi:10.1146/annurev-phyto-072910-095235
- 534     **Njaramb, T. (2000)** Assessment of the Level of Resistance to Bifenthrin,  
535     Cypermethrin and Methomyl Insecticides in *Bemisia tabaci (Gennadius)* and  
536     *Trialeurodes vaporariorum (Westwood)* Whitefly Populations from Selected  
537     Sites in Kenya (Msc.thesis).
- 538     **Olson, D. M., Dinerstein, E., Global, T. H. E., & David, P. (2002)** The Global 200:  
539     Priority Ecoregions for Global Conservation. *Missour Botanical Garden*, 89(2),  
540     199–224.
- 541     **Ovčarenko, I., Kapantaidaki, D., Lindström, L., Gauthier, N., Tsagkarakou, A., Knott,**  
542     **K. & Vänninen, I. (2014)** Agroecosystems shape population genetic structure of

- 543 the greenhouse whitefly in Northern and Southern Europe. *BMC Evolutionary*  
544 *Biology*, 14, 165. doi:10.1186/s12862-014-0165-4
- 545 **Peakall, R. & Smouse, P. E. (2012)** GenAlEx 6 . 5: genetic analysis in Excel .  
546 Population genetic software for teaching and research — an update, 28(19),  
547 2537–2539. doi:10.1093/bioinformatics/bts460
- 548 **Prijić, M., Marčić, D., Drobnjaković, T., Međo, I. & Perić, P. (2013)** Life History  
549 Traits and Population Growth of Greenhouse Whitefly on Different Tomato  
550 Genotypes. *Pesticid Phytomed*, 28(4), 239–245. doi:10.2298/PIF1304239P
- 551 **Prijić, M., Skaljic, M., Drobnjaković, T., Zanić, K., Perić, P., Marčić, D., & Puizina, J.**  
552 **(2014)** Genetic variation of the greenhouse whitefly, *Trialeurodes vaporariorum*  
553 (*Hemiptera: Aleyrodidae*), among populations from Serbia and neighbouring  
554 countries, as inferred from COI sequence variability. *Bulletin of Entomological*  
555 *Research*, 1, 1–10. doi:10.1017/S0007485314000169
- 556 **Swofford, D. L. (2003)** PAUP\*. Phylogenetic Analysis Using Parsimony (\*and Other  
557 Methods). Version 4. Sinauer Associates, Sunderland, Massachusetts.
- 558 **Rambaut A, Suchard, M. A., Xie, D. & Drummond, A. J (2014)** Tracer v1.6,  
559 Available from <http://beast.bio.ed.ac.uk/Tracer>  
560
- 561 **Roopa, H. K., Kumar, N. K. K., Asokan, R., Rebijith, K. B., Mahmood, R. & Verghese,**  
562 **A. (2012)** Phylogenetic Analysis of *Trialeurodes Spp.*(*Hemiptera: Aleyrodidae*)  
563 from India Based on Differences in Mitochondrial and Nuclear Dna. *Florida*  
564 *Entomologist*, 95(December), 1086–1094. doi:10.1653/024.095.0438
- 565 **Gao, R. R., Zhang, W.-P., Wu, H.-T., Zhang, R.-M., Zhou, H.-X., Pan, H.-P., Zhang, Y.-J.,**  
566 **Brown, J. K. & Chu, D. (2014)** Population Structure of the Greenhouse Whitefly,  
567 *Trialeurodes vaporariorum* (Westwood), an Invasive Species from the Americas,  
568 60 Years after Invading China. *International Journal of Molecular Sciences*, 15(8),  
569 13388–13400. doi:10.3390/ijms150813388

570



571 **Shin, D., Mo, H. H., Lee, S. E., Park, J. J. & Cho, K. (2013)** Elucidation of the genetic  
572 differences in *Trialeurodes vaporariorum* populations under vegetable  
573 greenhouse conditions by using the allozyme approach. *Entomological Research*,  
574 43(5), 271–281. doi:10.1111/1748-5967.12032

575 **Sseruwagi, P., Maruthi, M. N., Colvin, J., Rey, M. E. C., Brown, J. K. & Legg, J. P.**  
576 **(2006)** Colonization of non-cassava plant species by cassava whiteflies (*Bemisia*  
577 *tabaci*) in Uganda. *Entomologia Experimentalis et Applicata*, 119(Cmd), 145–153.  
578 doi:10.1111/j.1570-7458.2006.00402.x

579 **Ulrich, A. (2014)** Export-Oriented Horticultural Production in Laikipia, Kenya:  
580 Assessing the Implications for Rural Livelihoods. *Sustainability*, 6, 336–347.  
581 doi:10.3390/su6010336

582 **Wintermantel, W. M., Hladky, L. L., Gulati-Sakhuja, A., Li, R., Liu, H. Y. & Tzanetakis,**  
583 **I. E. (2009)** The complete nucleotide sequence and genome organization of  
584 tomato infectious chlorosis virus: A distinct *crinivirus* most closely related to  
585 lettuce infectious yellows virus. *Archives of Virology*, 154(8), 1335–1341.  
586 doi:10.1007/s00705-009-0432-7

587

588

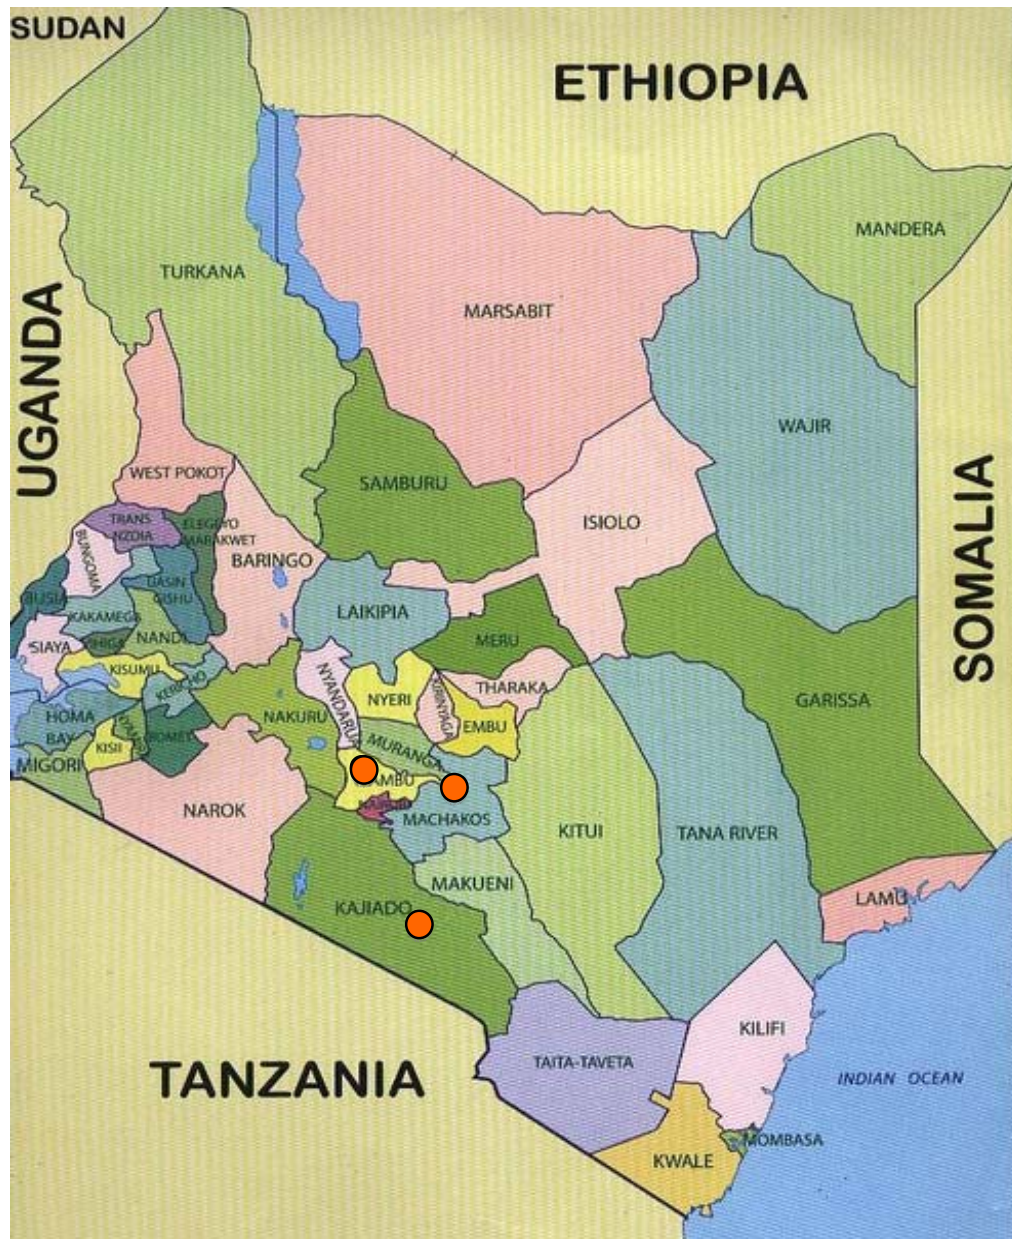

589  
590

591 **Figure 1:** Map of Kenya with Sampling Points included in this study are highlighted

592 **Source:** [www.map1907.holes](http://www.map1907.holes)

593 **Key**

594  Sampling points for whitefly

595

596

597 **Table 1:** *Trialeurodes vaporariorum* across geographical location and host plant

598 collected in this study.

599

600

601

| *Location       | Coordinates          | Host Plant                                 | No of samples<br>sequenced | GenBank<br>Accession<br>Numbers                                                                                         |
|-----------------|----------------------|--------------------------------------------|----------------------------|-------------------------------------------------------------------------------------------------------------------------|
| <b>Kajiado</b>  | -1.842073, 36.79186  | <i>Phaseolus vulgaris</i><br>(Common Bean) | 2                          | KX058204,<br>KX058211                                                                                                   |
| <b>Katumani</b> | -1.618715, 37.215651 | <i>Phaseolus vulgaris</i><br>(Common Bean) | 4                          | KX058202<br>KX058205<br>KX058207<br>KX058214                                                                            |
| <b>Kiambu</b>   | -1.280825, 36.652756 | <i>Phaseolus vulgaris</i><br>(Common Bean) | 25                         | KX058201-<br>KX058203<br>KX058206<br>KX058208-<br>KX058209<br>KX058210<br>KX058212<br>KX058213<br>KX058215-<br>KX058231 |

602 \*Location is the county or sub county in Kenya where whiteflies were collected in

603 2014.

604

605

606

607 **Table 2:** *Trialeurodes vaporariorum* haplotypes from across geographical locations

608 determined using GenAlex 6.502

609

| Haplotypes | Location 1 | Location 2 | Location 3 | Location 4 | Location 5 | N  | *GenBank<br>Accession<br>Number |
|------------|------------|------------|------------|------------|------------|----|---------------------------------|
| Hp-1       | -          | -          | 1          | -          | -          | 1  | JF682887                        |
| Hp-2       | 2          | -          | -          | -          | -          | 2  | KC843068                        |
| Hp-3       | 6          | -          | -          | -          | -          | 6  | KC843065                        |
| Hp-4       | 2          | -          | -          | -          | -          | 2  | KC843067                        |
| Hp-5       | -          | -          | 1          | -          | -          | 1  | JF682883                        |
| Hp-6       | -          | -          | 1          | -          | -          | 1  | JF682882                        |
| Hp-7       | -          | -          | 1          | -          | -          | 1  | JF682881                        |
| Hp-8       | -          | -          | 1          | -          | -          | 1  | JF682885                        |
| Hp-9       | 4          | 23         | 2          | -          | -          | 29 | LN614547                        |
| Hp-10      | 1          | 7          | -          | -          | -          | 8  | KX058224                        |
| Hp-11      | -          | 1          | -          | -          | -          | 1  | KX058231                        |
| Hp-12      | -          | -          | 1          | -          | -          | 1  | JF682888                        |
| Hp-13      | 1          | -          | -          | -          | -          | 1  | KJ475455                        |
| Hp-14      | 1          | -          | -          | -          | -          | 1  | KJ475454                        |
| Hp-15      | 2          | -          | -          | -          | -          | 2  | KF921192                        |
| Hp-16      | -          | -          | -          | 2          | -          | 2  | JX841223                        |
| Hp-17      | 1          | -          | -          | -          | -          | 1  | HE863766                        |
| Hp-18      | 20         | -          | 2          | 4          | 1          | 27 | KC113579                        |
| Hp-19      | -          | -          | 1          | 1          | -          | 2  | JQ995233                        |

610

611 **Key**

612 \*Representative GenBank Accession number provided for each haplotype.

613 \*N= Total Number of Haplotypes across the five world *Trialeurodes vaporariorum*  
614 populations

615 **Geographical Location 1:** Europe Asia, and North Africa

616 **Geographical Location 2:** Sub Saharan (Kenya, this study)

617 **Geographical Location 3:** South America, Central America, and the Carribean

618 **Geographical Location 4:** India and China

619 **Geographical Location 5:** North America (USA)

620

621

622

623

624

625 **Table 3:** Variation of mitochondria COI sequences from *Trialeurodes vaporariorum*

626 across four geographical locations calculated using DNAsp v 5.0.

|                                      | Pop 1      | Pop 2      | Pop 3      | Pop 4      |
|--------------------------------------|------------|------------|------------|------------|
| Number of Individuals                | 40         | 31         | 10         | 7          |
| Number of Haplotypes (h)             | 10         | 3          | 8          | 3          |
| Haplotype (gene) diversity (Hd)      | 0.726      | 0.411      | 0.956      | 0.524      |
| Nucleotide diversity (per site) (Pi) | 0.00248    | 0.00096    | 0.00351    | 0.00129    |
| <b>Neutrality Tests</b>              |            |            |            |            |
| Tajima's D                           | -1.58699   | -0.30315   | 0.00351    | -1.23716   |
|                                      | (P > 0.10) | (P > 0.10) | (P > 0.05) | (P > 0.10) |

627 \*Four of the five population were considered; Population 5 was dropped since only  
628 one *Trialeurodes vaporariorum* sequence present from the GenBank.

629

630

631

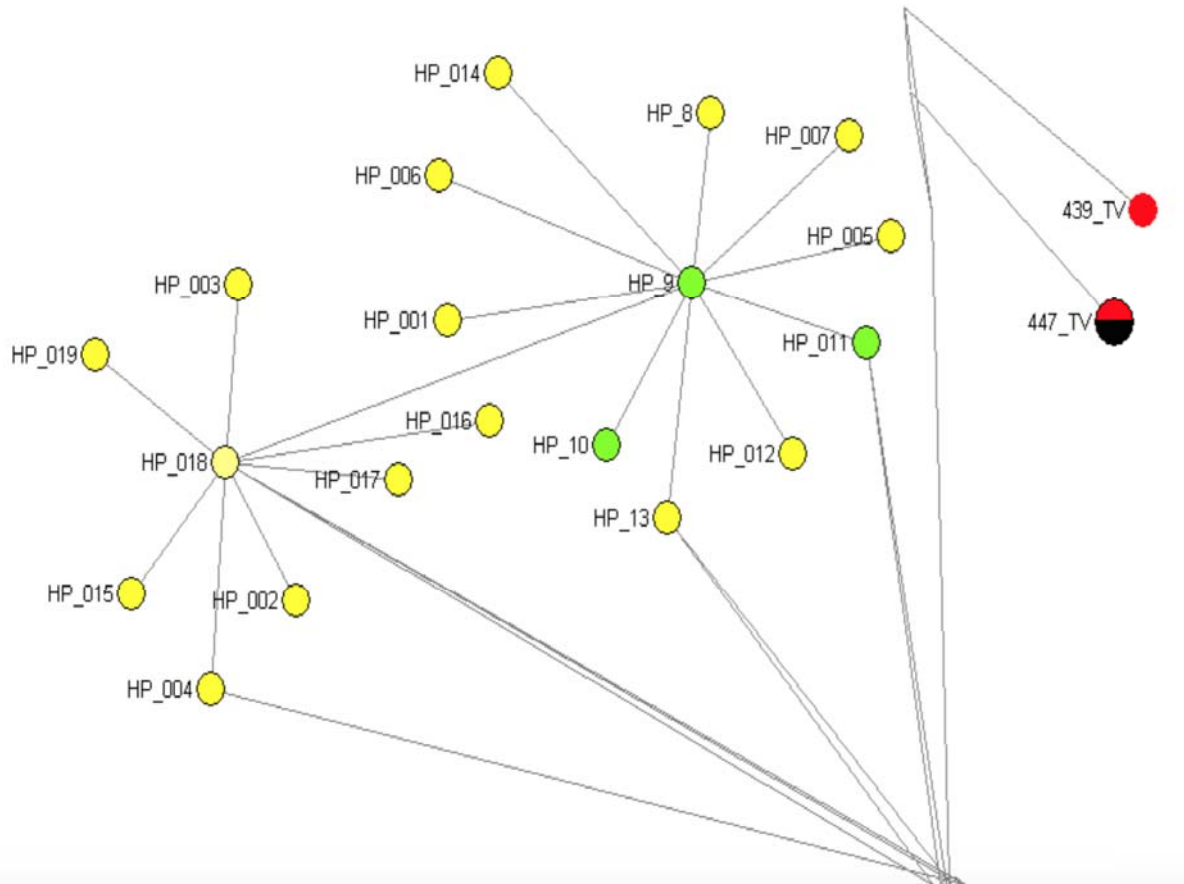

632

633

634

635

636

637

638

639

640

641

642

**Fig 2:** Median joining network for 19 MtCO1 haplotypes of *Trialeurodes vaporariorum* and 3 outgroup sequences (*Trialeurodes ricin*, *Trialeurodes lauri*). Median joining networks were generated using the program NETWORK version 5.0. Haplotypes in circulation in Kenya are highlighted in green while the ancestral haplotypes are in red/black.

643  
644 **Fig 3.** Bayesian phylogenetic relationships of representative *T. vaporariorum* and two  
645 outgroups (*T. ricin*, *T. lauri*) generated with MrBayes 3.2.2. Branches in  
646 supplemental figure 2 with zero branch length were collapsed.

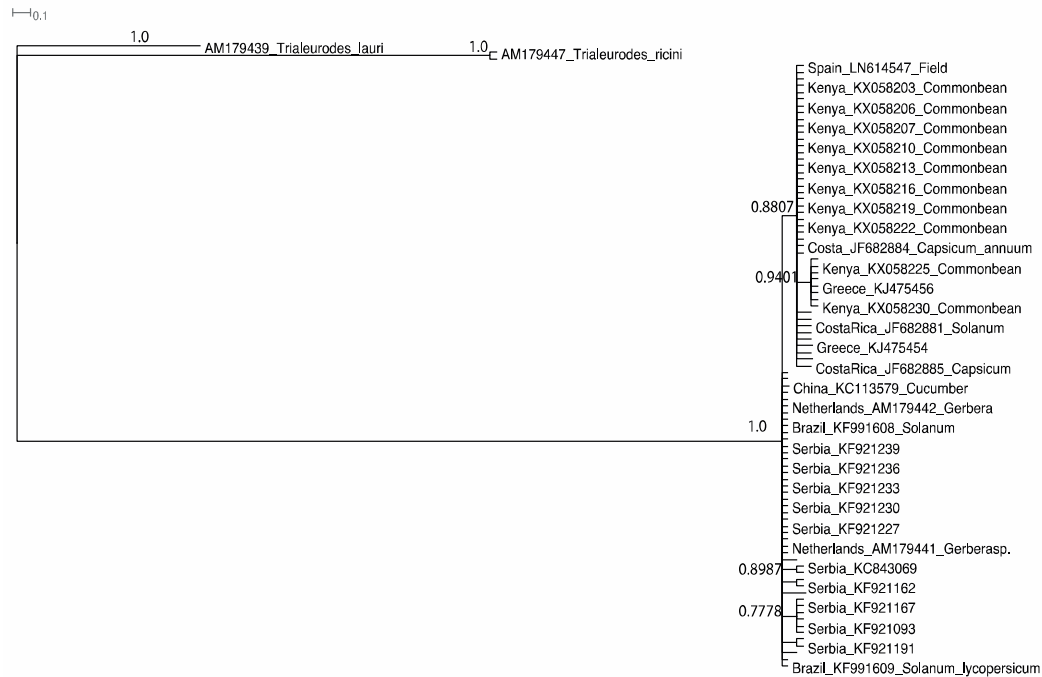

647

648  
 649 **Table 4:** Posterior probabilities on the number of populations (K) within *Trialeurodes*  
 650 *vaporariorum* for the COI sequences across geographical locations using  
 651 Structurama 2.0.

| Number of Population<br>(K) | Posterior Probability |
|-----------------------------|-----------------------|
| 1                           | 0.72                  |
| 2                           | 0.17                  |
| 3                           | 0.07                  |
| 4                           | 0.02                  |
| 5                           | 0.01                  |
| 6                           | 0.0                   |



Table 5: Species Delimitation estimation using the species delimitation plugin in Geneious 8.1.8 on representative *Trialeurodes vaporariorum* across five global geographical locations

| Species | Closet Species | Monophyletic | Intra Dist | Inter Dist Closest (K2P(% difference)) | Intra/Inter | P ID(Strict)     | P ID(Liberal)    | Av (MRCA-tips) | P (Randomly distinct) | Clade Support | Rosenberg's P (AB) |
|---------|----------------|--------------|------------|----------------------------------------|-------------|------------------|------------------|----------------|-----------------------|---------------|--------------------|
| 1       | 2              | Yes          | -2.44E-03  | -1.21E-01                              | 0.02        | 0.94 (0.83, 1.0) | 1.00 (0.94, 1.0) | -1.22E-03      | 0.05                  | 83.56         | 2.3E-13            |
| 2       | 1              | Yes          | -7.92E-03  | -1.21E-01                              | 0.07        | 0.97 (0.92, 1.0) | 0.99 (0.97, 1.0) | -2.09E-02      | 0.05                  |               | 2.3E-13            |

**Supplementary Table 1:** *Trialeurodes vaporariorum* COI sequence from GenBank and this study with respective haplotype and Geographical regions assigned

| Country     | Geographical Location Assigned                    | Haplotype (HP_) | GenBank Accession Numbers |
|-------------|---------------------------------------------------|-----------------|---------------------------|
| Costa Rica  | South America, Central America, and the Caribbean | 1               | JF682887                  |
| Serbia      | Europe, Asia, and North Africa                    | 2               | KC843068                  |
| Serbia      | Europe, Asia, and North Africa                    | 2               | KF921191                  |
| Serbia      | Europe, Asia, and North Africa                    | 3               | KC843065                  |
| Serbia      | Europe, Asia, and North Africa                    | 3               | KF921167                  |
| Serbia      | Europe, Asia, and North Africa                    | 3               | KF921104                  |
| Serbia      | Europe, Asia, and North Africa                    | 3               | KF921096                  |
| Serbia      | Europe, Asia, and North Africa                    | 3               | KF921093                  |
| Serbia      | Europe, Asia, and North Africa                    | 3               | KF921092                  |
| Serbia      | Europe, Asia, and North Africa                    | 4               | KC843067                  |
| Serbia      | Europe, Asia, and North Africa                    | 4               | KF921162                  |
| Costa       | South America, Central America, and the Caribbean | 5               | JF682883                  |
| Costa Rica  | South America, Central America, and the Caribbean | 6               | JF682882                  |
| Costa Rica  | South America, Central America, and the Caribbean | 7               | JF682881                  |
| Costa Rica  | South America, Central America, and the Caribbean | 8               | JF682885                  |
| Spain       | Europe, Asia, and North Africa                    | 9               | LN614547                  |
| Kenya       | Sub Saharan                                       | 9               | KX058201                  |
| Kenya       | Sub Saharan                                       | 9               | KX058202                  |
| Kenya       | Sub Saharan                                       | 9               | KX058203                  |
| Kenya       | Sub Saharan                                       | 9               | KX058204                  |
| Kenya       | Sub Saharan                                       | 9               | KX058205                  |
| Kenya       | Sub Saharan                                       | 9               | KX058206                  |
| Netherlands | Europe, Asia, and North Africa                    | 9               | AM179446                  |
| Greece      | Europe, Asia, and North Africa                    | 9               | KJ475453                  |
| Kenya       | Sub Saharan                                       | 9               | KX058207                  |
| Kenya       | Sub Saharan                                       | 9               | KX058208                  |
| Kenya       | Sub Saharan                                       | 9               | KX058209                  |
| Kenya       | Sub Saharan                                       | 9               | KX058210                  |
| Kenya       | Sub Saharan                                       | 9               | KX058211                  |
| Kenya       | Sub Saharan                                       | 9               | KX058212                  |
| Kenya       | Sub Saharan                                       | 9               | KX058213                  |
| Kenya       | Sub Saharan                                       | 9               | KX058214                  |
| Kenya       | Sub Saharan                                       | 9               | KX058215                  |
| Kenya       | Sub Saharan                                       | 9               | KX058216                  |
| Kenya       | Sub Saharan                                       | 9               | KX058217                  |
| Kenya       | Sub Saharan                                       | 9               | KX058218                  |
| Kenya       | Sub Saharan                                       | 9               | KX058219                  |
| Kenya       | Sub Saharan                                       | 9               | KX058220                  |

|                |                                                   |    |          |
|----------------|---------------------------------------------------|----|----------|
| Kenya          | Sub Saharan                                       | 9  | KX058221 |
| Kenya          | Sub Saharan                                       | 9  | KX058222 |
| Kenya          | Sub Saharan                                       | 9  | KX058223 |
| Costa Rica     | South America, Central America, and the Caribbean | 9  | JF682886 |
| Costa Rica     | South America, Central America, Caribbean         | 9  | JF682884 |
| Spain          | Europe, Asia, and North Africa                    | 9  | AM179446 |
| Kenya          | Sub Saharan                                       | 10 | KX058224 |
| Kenya          | Sub Saharan                                       | 10 | KX058225 |
| Kenya          | Sub Saharan                                       | 10 | KX058226 |
| Kenya          | Sub Saharan                                       | 10 | KX058227 |
| Greece         | Europe, Asia, and North Africa                    | 10 | KJ475456 |
| Kenya          | Sub Saharan                                       | 10 | KX058228 |
| Kenya          | Sub Saharan                                       | 10 | KX058229 |
| Kenya          | Sub Saharan                                       | 10 | KX058230 |
| Kenya          | Sub Saharan                                       | 11 | KX058231 |
| Costa Rica     | South America, Central America, and the Caribbean | 12 | JF682888 |
| Greece         | Europe, Asia, and North Africa                    | 13 | KJ475455 |
| Greece         | Europe, Asia, and North Africa                    | 14 | KJ475454 |
| Serbia         | Europe, Asia, and North Africa                    | 15 | KC843069 |
| Serbia         | Europe, Asia, and North Africa                    | 15 | KF921192 |
| India          | Europe, Asia, and North Africa                    | 16 | JX841223 |
| Morocco        | Europe, Asia, and North Africa                    | 17 | HE863766 |
| India          | Europe, Asia, and North Africa                    | 18 | JQ995232 |
| India          | Europe, Asia, and North Africa                    | 18 | JQ995231 |
| China          | Europe, Asia, and North Africa                    | 18 | KC113579 |
| United Kingdom | Europe, Asia, and North Africa                    | 18 | AM179444 |
| Netherlands    | Europe, Asia, and North Africa                    | 18 | AM179443 |
| Netherlands    | Europe, Asia, and North Africa                    | 18 | AM179442 |
| Netherlands    | Europe, Asia, and North Africa                    | 18 | AM179445 |
| Greece         | Europe, Asia, and North Africa                    | 18 | KJ475452 |
| Brazil         | South America, Central America, Caribbean         | 18 | KF991608 |
| Brazil         | South America, Central America, Caribbean         | 18 | KF991609 |
| Serbia         | Europe, Asia, and North Africa                    | 18 | KF921271 |
| Serbia         | Europe, Asia, and North Africa                    | 18 | KF921270 |
| Serbia         | Europe, Asia, and North Africa                    | 18 | KF921269 |
| Serbia         | Europe, Asia, and North Africa                    | 18 | KF921268 |
| Serbia         | Europe, Asia, and North Africa                    | 18 | KF921267 |
| Serbia         | Europe, Asia, and North Africa                    | 18 | KF921266 |
| Serbia         | Europe, Asia, and North Africa                    | 18 | KF921265 |
| Serbia         | Europe, Asia, and North Africa                    | 18 | KF921264 |
| Serbia         | Europe, Asia, and North Africa                    | 18 | KF921263 |
| Serbia         | Europe, Asia, and North Africa                    | 18 | KF921262 |
| Serbia         | Europe, Asia, and North Africa                    | 18 | KF921261 |

|        |                                |    |          |
|--------|--------------------------------|----|----------|
| Serbia | Europe, Asia, and North Africa | 18 | KF921260 |
| Serbia | Europe, Asia, and North Africa | 18 | KF921259 |
| Serbia | Europe, Asia, and North Africa | 18 | KF921258 |
| Serbia | Europe, Asia, and North Africa | 18 | KF921257 |
| Serbia | Europe, Asia, and North Africa | 18 | KF921256 |
| Serbia | Europe, Asia, and North Africa | 18 | KF921255 |
| Serbia | Europe, Asia, and North Africa | 18 | KF921254 |
| Serbia | Europe, Asia, and North Africa | 18 | KF921253 |
| Serbia | Europe, Asia, and North Africa | 18 | KF921252 |
| Serbia | Europe, Asia, and North Africa | 18 | KF921251 |
| Serbia | Europe, Asia, and North Africa | 18 | KF921250 |
| Serbia | Europe, Asia, and North Africa | 18 | KF921249 |
| Serbia | Europe, Asia, and North Africa | 18 | KF921248 |
| Serbia | Europe, Asia, and North Africa | 18 | KF921247 |
| Serbia | Europe, Asia, and North Africa | 18 | KF921246 |
| Serbia | Europe, Asia, and North Africa | 18 | KF921245 |
| Serbia | Europe, Asia, and North Africa | 18 | KF921244 |
| Serbia | Europe, Asia, and North Africa | 18 | KF921243 |
| Serbia | Europe, Asia, and North Africa | 18 | KF921242 |
| Serbia | Europe, Asia, and North Africa | 18 | KF921241 |
| Serbia | Europe, Asia, and North Africa | 18 | KF921240 |
| Serbia | Europe, Asia, and North Africa | 18 | KF921239 |
| Serbia | Europe, Asia, and North Africa | 18 | KF921238 |
| Serbia | Europe, Asia, and North Africa | 18 | KF921237 |
| Serbia | Europe, Asia, and North Africa | 18 | KF921236 |
| Serbia | Europe, Asia, and North Africa | 18 | KF921235 |
| Serbia | Europe, Asia, and North Africa | 18 | KF921234 |
| Serbia | Europe, Asia, and North Africa | 18 | KF921233 |
| Serbia | Europe, Asia, and North Africa | 18 | KF921232 |
| Serbia | Europe, Asia, and North Africa | 18 | KF921231 |
| Serbia | Europe, Asia, and North Africa | 18 | KF921230 |
| Serbia | Europe, Asia, and North Africa | 18 | KF921229 |
| Serbia | Europe, Asia, and North Africa | 18 | KF921228 |
| Serbia | Europe, Asia, and North Africa | 18 | KF921227 |
| Serbia | Europe, Asia, and North Africa | 18 | KF921226 |
| Serbia | Europe, Asia, and North Africa | 18 | KF921219 |
| Serbia | Europe, Asia, and North Africa | 18 | KF921218 |
| Serbia | Europe, Asia, and North Africa | 18 | KF921217 |
| Serbia | Europe, Asia, and North Africa | 18 | KF921216 |
| Serbia | Europe, Asia, and North Africa | 18 | KF921215 |
| Serbia | Europe, Asia, and North Africa | 18 | KF921214 |
| Serbia | Europe, Asia, and North Africa | 18 | KF921213 |
| Serbia | Europe, Asia, and North Africa | 18 | KF921212 |
| Serbia | Europe, Asia, and North Africa | 18 | KF921211 |

|        |                                |    |          |
|--------|--------------------------------|----|----------|
| Serbia | Europe, Asia, and North Africa | 18 | KF921210 |
| Serbia | Europe, Asia, and North Africa | 18 | KF921209 |
| Serbia | Europe, Asia, and North Africa | 18 | KF921208 |
| Serbia | Europe, Asia, and North Africa | 18 | KF921207 |
| Serbia | Europe, Asia, and North Africa | 18 | KF921206 |
| Serbia | Europe, Asia, and North Africa | 18 | KF921205 |
| Serbia | Europe, Asia, and North Africa | 18 | KF921204 |
| Serbia | Europe, Asia, and North Africa | 18 | KF921203 |
| Serbia | Europe, Asia, and North Africa | 18 | KF921202 |
| Serbia | Europe, Asia, and North Africa | 18 | KF921201 |
| Serbia | Europe, Asia, and North Africa | 18 | KF921200 |
| Serbia | Europe, Asia, and North Africa | 18 | KF921199 |
| Serbia | Europe, Asia, and North Africa | 18 | KF921198 |
| Serbia | Europe, Asia, and North Africa | 18 | KF921197 |
| Serbia | Europe, Asia, and North Africa | 18 | KF921196 |
| Serbia | Europe, Asia, and North Africa | 18 | KF921195 |
| Serbia | Europe, Asia, and North Africa | 18 | KF921194 |
| Serbia | Europe, Asia, and North Africa | 18 | KF921193 |
| Serbia | Europe, Asia, and North Africa | 18 | KF921190 |
| Serbia | Europe, Asia, and North Africa | 18 | KF921189 |
| Serbia | Europe, Asia, and North Africa | 18 | KF921188 |
| Serbia | Europe, Asia, and North Africa | 18 | KF921187 |
| Serbia | Europe, Asia, and North Africa | 18 | KF921186 |
| Serbia | Europe, Asia, and North Africa | 18 | KF921185 |
| Serbia | Europe, Asia, and North Africa | 18 | KF921184 |
| Serbia | Europe, Asia, and North Africa | 18 | KF921183 |
| Serbia | Europe, Asia, and North Africa | 18 | KF921182 |
| Serbia | Europe, Asia, and North Africa | 18 | KF921181 |
| Serbia | Europe, Asia, and North Africa | 18 | KF921180 |
| Serbia | Europe, Asia, and North Africa | 18 | KF921179 |
| Serbia | Europe, Asia, and North Africa | 18 | KF921178 |
| Serbia | Europe, Asia, and North Africa | 18 | KF921177 |
| Serbia | Europe, Asia, and North Africa | 18 | KF921176 |
| Serbia | Europe, Asia, and North Africa | 18 | KF921175 |
| Serbia | Europe, Asia, and North Africa | 18 | KF921174 |
| Serbia | Europe, Asia, and North Africa | 18 | KF921173 |
| Serbia | Europe, Asia, and North Africa | 18 | KF921172 |
| Serbia | Europe, Asia, and North Africa | 18 | KF921171 |
| Serbia | Europe, Asia, and North Africa | 18 | KF921170 |
| Serbia | Europe, Asia, and North Africa | 18 | KF921169 |
| Serbia | Europe, Asia, and North Africa | 18 | KF921168 |
| Serbia | Europe, Asia, and North Africa | 18 | KF921166 |
| Serbia | Europe, Asia, and North Africa | 18 | KF921165 |
| Serbia | Europe, Asia, and North Africa | 18 | KF921164 |

|        |                                |    |          |
|--------|--------------------------------|----|----------|
| Serbia | Europe, Asia, and North Africa | 18 | KF921163 |
| Serbia | Europe, Asia, and North Africa | 18 | KF921161 |
| Serbia | Europe, Asia, and North Africa | 18 | KF921160 |
| Serbia | Europe, Asia, and North Africa | 18 | KF921159 |
| Serbia | Europe, Asia, and North Africa | 18 | KF921158 |
| Serbia | Europe, Asia, and North Africa | 18 | KF921157 |
| Serbia | Europe, Asia, and North Africa | 18 | KF921156 |
| Serbia | Europe, Asia, and North Africa | 18 | KF921155 |
| Serbia | Europe, Asia, and North Africa | 18 | KF921154 |
| Serbia | Europe, Asia, and North Africa | 18 | KF921153 |
| Serbia | Europe, Asia, and North Africa | 18 | KF921152 |
| Serbia | Europe, Asia, and North Africa | 18 | KF921151 |
| Serbia | Europe, Asia, and North Africa | 18 | KF921150 |
| Serbia | Europe, Asia, and North Africa | 18 | KF921149 |
| Serbia | Europe, Asia, and North Africa | 18 | KF921148 |
| Serbia | Europe, Asia, and North Africa | 18 | KF921147 |
| Serbia | Europe, Asia, and North Africa | 18 | KF921146 |
| Serbia | Europe, Asia, and North Africa | 18 | KF921145 |
| Serbia | Europe, Asia, and North Africa | 18 | KF921144 |
| Serbia | Europe, Asia, and North Africa | 18 | KF921143 |
| Serbia | Europe, Asia, and North Africa | 18 | KF921142 |
| Serbia | Europe, Asia, and North Africa | 18 | KF921140 |
| Serbia | Europe, Asia, and North Africa | 18 | KF921139 |
| Serbia | Europe, Asia, and North Africa | 18 | KF921138 |
| Serbia | Europe, Asia, and North Africa | 18 | KF921137 |
| Serbia | Europe, Asia, and North Africa | 18 | KF921136 |
| Serbia | Europe, Asia, and North Africa | 18 | KF921135 |
| Serbia | Europe, Asia, and North Africa | 18 | KF921134 |
| Serbia | Europe, Asia, and North Africa | 18 | KF921133 |
| Serbia | Europe, Asia, and North Africa | 18 | KF921132 |
| Serbia | Europe, Asia, and North Africa | 18 | KF921131 |
| Serbia | Europe, Asia, and North Africa | 18 | KF921130 |
| Serbia | Europe, Asia, and North Africa | 18 | KF921129 |
| Serbia | Europe, Asia, and North Africa | 18 | KF921128 |
| Serbia | Europe, Asia, and North Africa | 18 | KF921127 |
| Serbia | Europe, Asia, and North Africa | 18 | KF921126 |
| Serbia | Europe, Asia, and North Africa | 18 | KF921125 |
| Serbia | Europe, Asia, and North Africa | 18 | KF921124 |
| Serbia | Europe, Asia, and North Africa | 18 | KF921123 |
| Serbia | Europe, Asia, and North Africa | 18 | KF921122 |
| Serbia | Europe, Asia, and North Africa | 18 | KF921121 |
| Serbia | Europe, Asia, and North Africa | 18 | KF921120 |
| Serbia | Europe, Asia, and North Africa | 18 | KF921119 |
| Serbia | Europe, Asia, and North Africa | 18 | KF921118 |

|            |                                |    |          |
|------------|--------------------------------|----|----------|
| Serbia     | Europe, Asia, and North Africa | 18 | KF921117 |
| Serbia     | Europe, Asia, and North Africa | 18 | KF921116 |
| Serbia     | Europe, Asia, and North Africa | 18 | KF921115 |
| Serbia     | Europe, Asia, and North Africa | 18 | KF921114 |
| Serbia     | Europe, Asia, and North Africa | 18 | KF921113 |
| Serbia     | Europe, Asia, and North Africa | 18 | KF921112 |
| Serbia     | Europe, Asia, and North Africa | 18 | KF921111 |
| Serbia     | Europe, Asia, and North Africa | 18 | KF921110 |
| Serbia     | Europe, Asia, and North Africa | 18 | KF921109 |
| Serbia     | Europe, Asia, and North Africa | 18 | KF921108 |
| Serbia     | Europe, Asia, and North Africa | 18 | KF921107 |
| Serbia     | Europe, Asia, and North Africa | 18 | KF921106 |
| Serbia     | Europe, Asia, and North Africa | 18 | KF921105 |
| Serbia     | Europe, Asia, and North Africa | 18 | KF921103 |
| Serbia     | Europe, Asia, and North Africa | 18 | KF921102 |
| Serbia     | Europe, Asia, and North Africa | 18 | KF921101 |
| Serbia     | Europe, Asia, and North Africa | 18 | KF921100 |
| Serbia     | Europe, Asia, and North Africa | 18 | KF921099 |
| Serbia     | Europe, Asia, and North Africa | 18 | KF921098 |
| Serbia     | Europe, Asia, and North Africa | 18 | KF921097 |
| Serbia     | Europe, Asia, and North Africa | 18 | KF921095 |
| Serbia     | Europe, Asia, and North Africa | 18 | KF921094 |
| Serbia     | Europe, Asia, and North Africa | 18 | KF921091 |
| Serbia     | Europe, Asia, and North Africa | 18 | KC843064 |
| Serbia     | Europe, Asia, and North Africa | 18 | KF921288 |
| Serbia     | Europe, Asia, and North Africa | 18 | KF921287 |
| Serbia     | Europe, Asia, and North Africa | 18 | KF921286 |
| Serbia     | Europe, Asia, and North Africa | 18 | KF921285 |
| Serbia     | Europe, Asia, and North Africa | 18 | KF921284 |
| Serbia     | Europe, Asia, and North Africa | 18 | KF921283 |
| Serbia     | Europe, Asia, and North Africa | 18 | KF921282 |
| Serbia     | Europe, Asia, and North Africa | 18 | KF921281 |
| Serbia     | Europe, Asia, and North Africa | 18 | KF921280 |
| Serbia     | Europe, Asia, and North Africa | 18 | KF921279 |
| Serbia     | Europe, Asia, and North Africa | 18 | KF921278 |
| Serbia     | Europe, Asia, and North Africa | 18 | KF921277 |
| Serbia     | Europe, Asia, and North Africa | 18 | KF921276 |
| Serbia     | Europe, Asia, and North Africa | 18 | KF921275 |
| Serbia     | Europe, Asia, and North Africa | 18 | KF921274 |
| Serbia     | Europe, Asia, and North Africa | 18 | KF921273 |
| Serbia     | Europe, Asia, and North Africa | 18 | KF921272 |
| China      | Europe, Asia, and North Africa | 18 | JF693934 |
| India      | Europe, Asia, and North Africa | 18 | JX841216 |
| Netherland | Europe, Asia, and North Africa | 18 | AM1794   |

|       |                                |    |          |
|-------|--------------------------------|----|----------|
| USA   | North America                  | 18 | AF110708 |
| India | Europe, Asia, and North Africa | 19 | JQ995233 |
